# Supplementary material
Source: bioRxiv or medRxiv preprint supplement (https://www.biorxiv.org/highwire/filestream/72173/field_highwire_adjunct_files/0/236067-1.pdf)

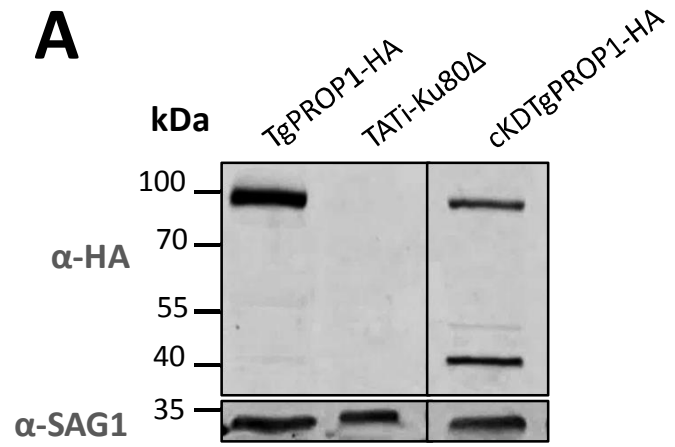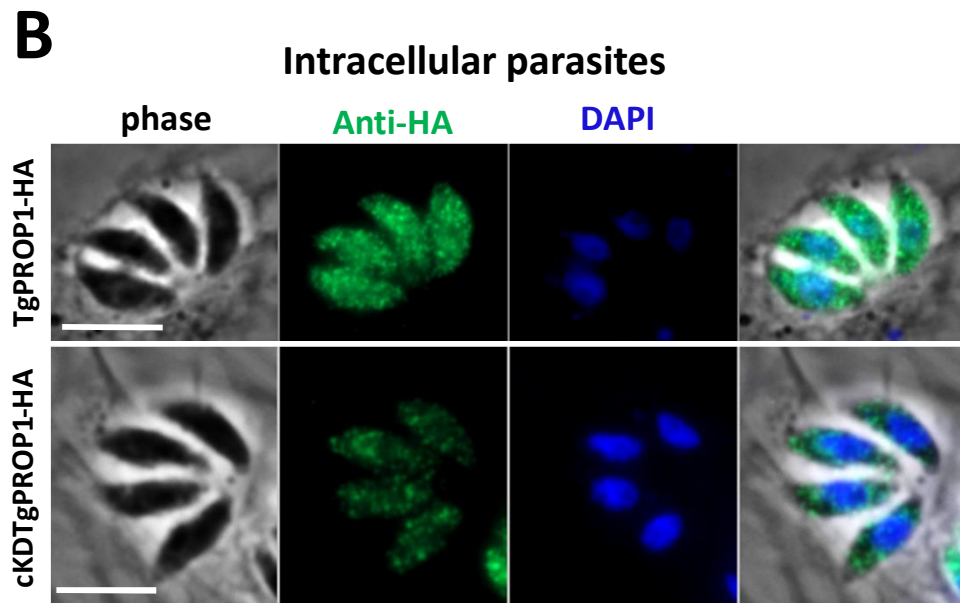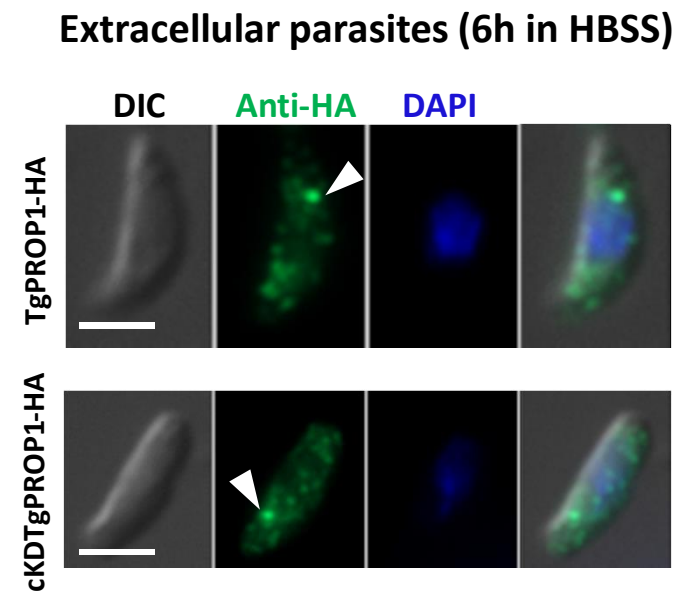

Supplement: Supplementary file [file 236067-1.pdf]
